# Supplementary material for: Towards Response ADAptive Radiotherapy for organ preservation for intermediate-risk rectal cancer (preRADAR): protocol of a phase I dose-escalation trial
Source: HighWire-hosted journal article supplement (doi:10.1136/bmjopen-2022-065010), 2023-06-01
Supplement: bmjopen-2022-065010supp001_data_supplement.pdf [file bmjopen-2022-065010supp001_data_supplement.pdf]

Proefpersoneninformatie preRADAR

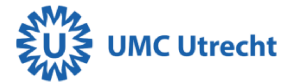

# Proefpersoneninformatie voor deelname aan medisch-wetenschappelijk onderzoek

## Hogere dosis bestraling voor niet-operatieve behandeling van endeldarmkanker: het preRADAR onderzoek

*Officiële titel: Respons ADaptieve Radiotherapie voor orgaansparende behandeling van  
intermediair risico rectumcarcinoom: een fase I dosisescalatie onderzoek*

### Inleiding

Geachte heer/mevrouw,

Met deze informatiebrief willen wij u vragen om mee te doen aan medisch-wetenschappelijk onderzoek. Meedoen is vrijwillig. U ontvangt deze brief omdat u binnenkort bestralingen (*radiotherapie*) voor endeldarmkanker ondergaat.

U leest hier om wat voor onderzoek het gaat, wat het voor u betekent, en wat de voordelen en nadelen zijn. Het is veel informatie. Wilt u de informatie doorlezen en beslissen of u wilt meedoen? Als u wilt meedoen, kunt u het formulier invullen dat u vindt in bijlage D.

#### *Stel uw vragen*

U kunt uw beslissing nemen met de informatie die u in deze informatiebrief vindt. Daarnaast raden we u aan om dit te doen:

- Stel vragen aan de onderzoeker die u deze informatie geeft.
- Praat met uw partner, familie, vrienden of de huisarts over dit onderzoek.
- Stel vragen aan de onafhankelijk deskundige, dr. Jochem van der Voort-van Zijp, bijlage A.
- Lees de informatie op [www.rijksoverheid.nl/mensenonderzoek](http://www.rijksoverheid.nl/mensenonderzoek).

### 1. Algemene informatie

Het Universitair Medisch Centrum (UMC) Utrecht en het Antoni Van Leeuwenhoek (AVL) hebben dit onderzoek opgezet. Bestralingsartsen (*radiotherapeut-oncologen*) in beide ziekenhuizen voeren dit onderzoek uit. Voor dit onderzoek zijn tussen de 6 en 45 proefpersonen nodig. Het aantal benodigde proefpersonen hangt af van de bevindingen tijdens het onderzoek. De medisch-ethische toetsingscommissie van het UMC Utrecht heeft dit onderzoek goedgekeurd.

## Proefpersoneninformatie preRADAR



## 2. Wat is het doel van het onderzoek?

In dit onderzoek kijken we tot welke hoogte de dosis van bestraling bij endeldarmkanker veilig gegeven kan worden. De laagste bestralingsdosis is 2 extra bestralingen. De bestralingsdosis wordt opgehoogd tot maximaal 5 extra bestralingen. Of totdat een bestralingsdosis niet meer veilig lijkt. 'Veilig' betekent in dit onderzoek dat maximaal 1 op de 9 deelnemers ernstige bijwerkingen van de bestraling heeft. Uiteindelijk hopen we dat bestraling met een hogere dosis bij meer patiënten met endeldarmkanker een operatie kan voorkomen.

Daarnaast kijken we in dit onderzoek welke bepalingen in bloed, tumorweefsel of ontlasting en welk type MR-scans voorspellen of de bestralingen goed bij u werken. Zo'n voorspelling kan bijdragen aan op maat gemaakte behandeling voor iedere patiënt.

## 3. Wat is de achtergrond van het onderzoek?

Voor patiënten met middelhoog risico endeldarmkanker is het al twintig jaar standaardzorg om vijf bestralingen voor de operatie te doen. Bij ongeveer 1 op de 10 patiënten lijkt de tumor weg na de bestralingen (zie Afbeelding 1). Sinds een paar jaar weten we dat we deze mensen veilig kunnen behandelen zonder een operatie waarbij de endeldarm wordt verwijderd. Wij denken dat we meer mensen met endeldarmkanker zonder operatie kunnen behandelen door met een hogere dosis te bestralen. We verwachten dat de hoogste bestralingsdosis van dit onderzoek bij ongeveer 4 op de 10 patiënten een behandeling zonder operatie mogelijk kan maken. Omdat we gericht kunnen bestralen op een nieuw bestralingsapparaat (*de MR-Linac*), denken we dat deze hogere dosis niet zo veel extra bijwerkingen geeft. Dat de hoogte van de bestralingsdosis in verband staat met de kans dat de tumor weg is, is al aangetoond in eerder onderzoek.

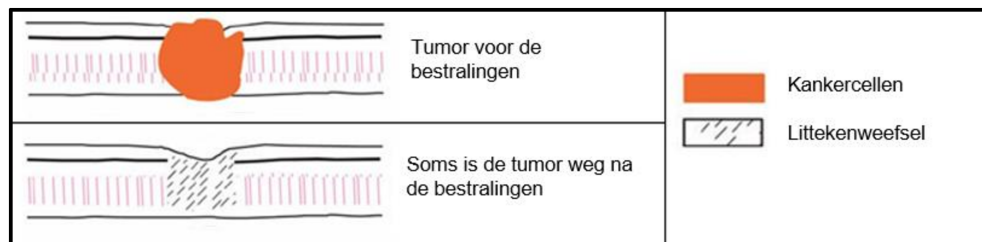

Afbeelding 1: bij ongeveer 1 op de 10 patiënten lijkt de tumor helemaal weg na de bestralingen.

Voordat we kunnen uitzoeken of bestralen met een hogere dosis inderdaad vaker leidt tot behandeling zonder operatie, moeten we eerst weten wat een veilige, hogere dosis is van die bestralingen. De hoogste, veilige dosis willen we daarom in dit onderzoek vaststellen.

Ten tweede willen we onderzoeken of we vroeg tijdens de behandeling kunnen voorspellen of de tumor weg zal zijn na de bestralingen. Dan kunnen we in de toekomst de hoogte van de bestralingsdosis per persoon aanpassen. Op dit moment weten we dat een paar eiwitten en

NL75671.041.21– versie 1.7 25-10--2022 pagina 2 van 20

## Proefpersoneninformatie preRADAR



cellen in bloed, tumorweefsel en ontlasting verband houden met de kans dat de tumor weg is na de bestraling. Dit geldt ook voor bepaald type MRI-scans. Maar die kennis is nog onvoldoende om de behandeling hierop aan te passen. Daarom vragen we u of we uw bloed, tumorweefsel en ontlasting mogen gebruiken voor onderzoek. En of we extra MRI-scans mogen maken. U kunt ook meedoen aan dit onderzoek zonder de extra afnames en MRI-scans.

### 4. Hoe verloopt het onderzoek?

#### *Hoelang duurt het onderzoek?*

Als u beslist om mee te doen aan dit onderzoek, duurt dat in totaal ongeveer 3 maanden.

#### *Stap 1: bent u geschikt om mee te doen?*

Uw behandelend radiotherapeut heeft in overleg met andere medisch specialisten, zoals de chirurg en internist-oncoloog, en de onderzoekers besloten dat u geschikt lijkt om mee te doen.

#### *Stap 2: de behandeling*

De behandeling start net zoals de standaardbehandeling met 5 bestralingen op 5 achtereenvolgende werkdagen. De standaardbestralingen zijn gericht op de gehele endeldarm en lymfekliergebieden, inclusief de tumor en de aangedane lymfeklieren (afbeelding 2, links). U komt de 2, 3, 4 of 5 werkdagen daarna extra naar het UMC Utrecht voor de bestralingen van het onderzoek. Deze extra bestralingen worden alleen op de tumor en de aangedane lymfeklieren gegeven (afbeelding 2, rechts). Of u 2, 3, 4 of 5 extra bestralingen krijgt, hoort u van de onderzoeker voor start van de behandeling. Dit aantal hangt af van de bevindingen bij de proefpersonen die eerder dan u hebben deelgenomen aan dit onderzoek.

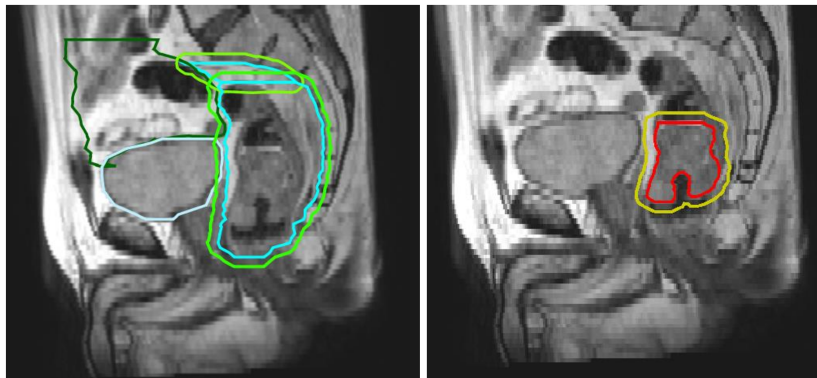

*Afbeelding 2: Twee MRI-opnames van het kleine bekken van een man met endeldarmkanker. Links is de buikzijde en rechts is de rugzijde. Op de linker afbeelding geeft het helderblauwe lijntje de gehele endeldarm aan, die bestraald wordt tijdens de vijf standaard bestralingen. Op de rechter afbeelding geeft het rode lijntje de tumor aan, die extra bestraald wordt op de extra bestralingsdagen.*

## Proefpersoneninformatie preRADAR



### Stap 3: controles en metingen

In de weken na de behandeling is het niet nodig dat u extra naar het ziekenhuis komt. Wel vinden controles plaats door:

- Telefoongesprekken. De onderzoeker belt u 8—12x in de weken na de bestraling om te horen hoe het gaat. Deze gesprekken duren ongeveer 10 minuten per keer.
- Bijhouden van een dagboek. We vragen u om 8-12x een dagboek in te vullen. Per keer stellen we u 5 vragen over uw darmfunctie. Invullen kan digitaal of op papier en kost u ongeveer 5 minuten per keer.

De telefoongesprekken en het bijhouden van het dagboek stoppen als u geopereerd wordt, of na 20 weken als u zonder operatie behandeld wordt.

### Stap 4: wel of niet opereren?

Na 11-13 weken komt u naar UMC Utrecht voor een MRI-scan en een kijkonderzoek van de darm (*endoscopie*). Daarmee kijken we hoe de tumor heeft gereageerd op de bestralingen. Als de tumor nog groot is, wordt u ingepland voor een endeldarmoperatie bij de chirurg in uw eigen ziekenhuis. Als de tumor (bijna) weg is, krijgt u 5-8 weken later nog een keer een MRI-scan en/of kijkonderzoek. Daarna wordt met u gekozen voor de uiteindelijke behandeling: geen operatie, een kleine ingreep onder narcose waarbij de resttumor oppervlakkig uit de endeldarm wordt gesneden (*lokale excisie*) of toch een endeldarmoperatie.

Extra onderdelen van dit onderzoek zijn:

- Afname van uw bloed. Dit doen we zo veel mogelijk wanneer we toch al bloed moeten prikken. Voor het onderzoek nemen we totaal 7 keer bloed af, per keer 20-50 ml. Ter vergelijking: iemand die bloed geeft bij de bloedbank, geeft per keer 500 ml bloed. Met het bloedonderzoek kijken we bijvoorbeeld naar afweercellen (witte bloedcellen) en naar stukjes genetisch materiaal van de tumor (*circulerend tumor DNA*) in het bloed.
- Opslag van tumorweefsel. Dit gaat om tumorweefsel dat toch al wordt afgenomen tijdens het kijkonderzoek in de darm of tijdens de endeldarmoperatie. Met het weefselonderzoek kijken we bijvoorbeeld naar de opbouw van de tumor op celniveau.
- Afname van ontlasting. We vragen u 3 keer een buisje met ontlasting op te sturen, inclusief een korte vragenlijst over de ontlasting. In de ontlasting kijken we bijvoorbeeld naar het type bacteriën.
- Extra MRI-opnames. Deze MRI-opnames vinden zo veel mogelijk plaats wanneer u toch al onder het bestralingsapparaat (*MR-Linac*) ligt voor de bestraling. We vragen of u het goed vindt om deze technische gegevens te delen in het internationale onderzoek naar de MR-Linac (*MOMENTUM*). Daarnaast vragen we uw toestemming voor een extra, losse scan voor start van de bestraling. En voor scans met contrastvloeistof dat in een bloedvat gespoten wordt.
- Invullen van vragenlijsten. We vinden het belangrijk om te weten wat de invloed van de ziekte en behandeling is op uw dagelijks leven en functioneren. Daarom vragen we

## Proefpersoneninformatie preRADAR



u om vragenlijsten in te vullen via het landelijk darmkanker onderzoek (PLCRC). De vragenlijsten gaan over kwaliteit van leven, darm- en blaasfunctie en seksualiteit. U krijgt deze vragenlijsten voor start van de behandeling en na 3, 6, 12, 18 en 24 maanden.

*Wat is er anders dan bij gewone zorg?*

In bijlage C staat een overzicht van de behandelingen en controles van dit onderzoek.

### 5. Welke afspraken maken we met u?

We willen graag dat het onderzoek goed verloopt. Daarom maken we de volgende afspraken met u:

- U houdt mogelijke bijwerkingen bij;
- U komt de afspraken voor bezoeken na;
- U neemt contact op met de onderzoeker in deze situaties:
  - o U wordt in een ziekenhuis opgenomen of behandeld.
  - o U krijgt plotseling problemen met uw gezondheid.
  - o U wilt niet meer meedoen met het onderzoek.
  - o Uw telefoonnummer, adres of e-mailadres verandert.

*Mag u of uw partner zwanger worden tijdens het onderzoek?*

Vrouwen die zwanger zijn, kunnen niet meedoen aan dit onderzoek. Vrouwen mogen ook niet zwanger worden tijdens het onderzoek. Bent u een man, en heeft u een vrouwelijke partner? Dan moet u ervoor zorgen dat zij niet zwanger kan worden van u. Bestralingen kunnen namelijk schadelijke gevolgen hebben voor een ongeboren kind.

### 6. Van welke bijwerkingen, nadelige effecten of ongemakken kunt u last krijgen?

*Bijwerkingen tijdens en in de weken na de bestraling*

Bestralen op de endeldarm geeft bij alle patiënten in meer of mindere mate bijwerkingen. Tijdens de eerste 2-4 weken na de vijf standaardbestralingen zien we de meeste bijwerkingen. Na deze periode herstellen de bijwerkingen geleidelijk. We verwachten dat de hogere dosis bestraling van dit onderzoek kan leiden tot vaker, langer of ernstiger bijwerkingen dan de standaardbestralingen in de eerste weken na de bestraling.

Deze bijwerkingen komen heel vaak voor in de 2-4 weken na bestralingen op de endeldarm (bij 5 op de 10 mensen of meer):

- Vermoeidheid;
- Frequente aandrang voor ontlasting;
- Moeite met ophouden van de ontlasting;
- Bloed- en/of slijmverlies bij de ontlasting.

## Proefpersoneninformatie preRADAR



Deze bijwerkingen komen vaak voor in de 2-4 weken na bestraling op de endeldarm (bij 1 op de 10 mensen of meer):

- Pijn bij de ontlasting;
- Buikkrampen;
- Gebrek aan eetlust en misselijkheid;
- Frequente aandrang voor plassen;
- Branderig gevoel bij het plassen.

Deze bijwerkingen komen soms voor in de 2-4 weken na bestraling op de endeldarm (bij 1 op de 100 mensen of meer):

- Bloedverlies bij de urine;
- Moeite met ophouden van de urine;
- Moeite met uitplassen;
- Beschadigde huid aan de billen.

U moet onmiddellijk contact opnemen met de onderzoeker als u last krijgt van:

- Ernstige diarree (> 7x /dag) tegelijkertijd met onvoldoende vochtinname (< 1,5 L / dag);
- Onhoudbare pijn;
- Beschadigde huid op het zitvlak met tekenen van infectie;
- Veranderd gevoel, pijn of tintelingen rondom het zitvlak of in de benen;
- Moeite met voor u zelf te zorgen door welke klachten dan ook.

### *Complicaties na de operatie*

Het is mogelijk dat een hogere dosis bestraling op de endeldarm een grotere kans geeft op complicaties na de operatie. Dit risico geldt alleen als het bij u toch nodig blijkt om de endeldarm te verwijderen. Mogelijke complicaties na de operatie zijn een lekkage van een nieuwe verbinding tussen darmen (*naadlekkage*), of een ontsteking van het operatiegebied (*wondinfectie*). Soms is het nodig dat een complicatie na de operatie behandeld wordt met bijvoorbeeld een nieuwe operatie, het aanleggen van een stoma of met opname op de Intensive Care. Het is niet zeker in welke mate een hogere dosis bestraling kan bijdragen aan complicaties na de operatie. Als we tijdens het onderzoek zien dat ernstige complicaties vaker optreden na een hogere dosis bestraling, zullen we met een lagere dosis gaan bestralen.

### *Lange termijn bijwerkingen*

In de jaren na bestraling en operatie voor endeldarmkanker krijgt een deel van de patiënten darmklachten, moeite met ophouden van de urine (*urine-incontinentie*) of problemen met seks. Het is mogelijk dat de hogere dosis bestraling van dit onderzoek een grotere kans geeft op deze lange termijn bijwerkingen. Maar wij verwachten dit niet, op basis van eerdere onderzoeken naar bestraling in het bekkengebied met een net zo hoge dosis. Als de hogere

## Proefpersoneninformatie preRADAR



dosis bestraling ervoor zorgt dat een operatie bij u niet nodig is, heeft u juist minder kans op lange termijn bijwerkingen.

### 7. Mogelijke voor- en nadelen

Meedoen aan het onderzoek kan voordelen en nadelen hebben. Hieronder zetten we ze op een rij. Denk hier goed over na, en praat erover met anderen.

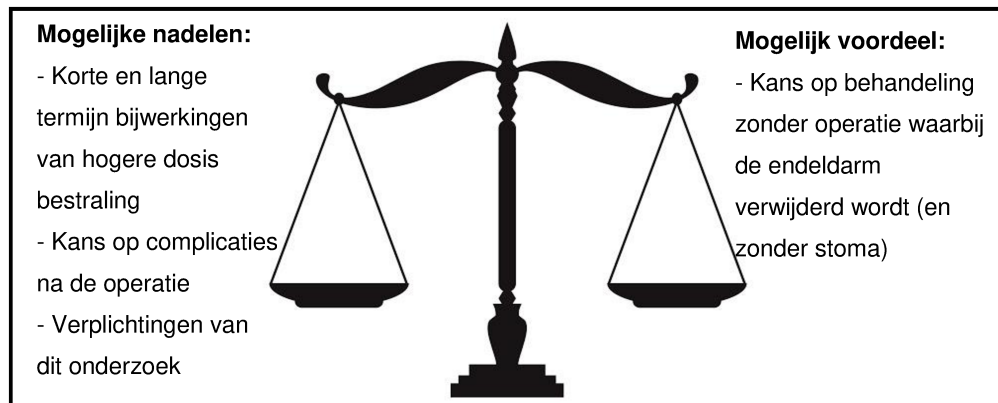

*Afbeelding 3: het is belangrijk dat u de mogelijke voor- en nadelen goed afweegt voordat u besluit mee te doen aan dit onderzoek.*

#### *Wat zijn de voordelen?*

Meedoen aan dit onderzoek kan u een grotere kans bieden om zonder endeldarmoperatie behandeld te worden. Maar zeker is dat niet. Als u zonder operatie behandeld kan worden, heeft u:

- geen pijn en ongemakken door de operatie (zoals een stoma);
- geen kans op complicaties na de operatie;
- minder kans op lange termijn bijwerkingen van de operatie zoals urine-incontinentie, problemen met seks of darmklachten.

#### *Wat zijn de nadelen?*

Meedoen aan dit onderzoek kan deze nadelen hebben:

- U kunt last krijgen van bijwerkingen of nadelige effecten van de extra bestralingen, zoals beschreven in hoofdstuk 6. Als u langdurig last houdt van matig-ernstige bijwerkingen in de weken na de bestraling, kan het zijn dat uitstel van de endeldarmoperatie nodig is;
- U bent extra tijd kwijt aan 2-5 extra ziekenhuisbezoeken voor bestraling, telefoongesprekken met de onderzoeker, het invullen van het dagboek over darmklachten en het invullen van vragenlijsten over kwaliteit van leven (zie bijlage C).

## Proefpersoneninformatie preRADAR



- Geeft u toestemming voor afname en opslag van bloed, tumorweefsel en ontlasting en/of extra MRI-opnames? Dan bent u hier mogelijk ook extra tijd aan kwijt. Daarnaast kan een bloedafname of het inspuiten van contrastvloeistof wat pijn doen;
- U moet zich aan de afspraken houden die horen bij dit onderzoek (zie hoofdstuk 5).

### *Wilt u niet meedoen?*

U beslist zelf of u meedoet aan het onderzoek. Wilt u niet meedoen? Dan krijgt u de gewone behandeling voor endeldarmkanker. De gewone behandeling voor middelgrote endeldarmtumoren is vijf bestralingen, in principe gevolgd door een operatie waarbij de endeldarm wordt verwijderd. Uw arts kan u meer vertellen over de behandelingsmogelijkheden die er zijn. En over de voor- en nadelen daarvan.

## 8. Wanneer stopt het onderzoek?

De onderzoeker laat het u weten als er nieuwe informatie over het onderzoek komt die belangrijk voor u is. De onderzoeker vraagt u daarna of u blijft meedoen.

In deze situaties stopt voor u het onderzoek:

- Alle onderzoeken volgens het schema zijn voorbij (20 weken na start van de bestralingen, of als u eerder geopereerd wordt);
- U wilt zelf stoppen met het onderzoek. Dat mag op ieder moment. Meld dit dan meteen bij de onderzoeker. U hoeft er niet bij te vertellen waarom u stopt. U krijgt dan weer de gewone behandeling voor endeldarmkanker. De onderzoeker kan voor uw veiligheid nog een of meer controles afspreken;
- De onderzoeker vindt het beter voor u om te stoppen;
- Het UMC Utrecht, de overheid of de beoordelende medisch-ethische toetsingscommissie, besluit om het onderzoek te stoppen.

### *Wat gebeurt er als u stopt met het onderzoek?*

De onderzoekers gebruiken de gegevens die tot het moment van stoppen zijn verzameld.

## 9. Wat gebeurt er na het onderzoek?

### *Krijgt u de resultaten van het onderzoek?*

Ongeveer 1 jaar na deelname van de laatste patiënt laat de onderzoeker u per brief of email weten wat de belangrijkste uitkomsten van het onderzoek zijn.

## 10. Wat doen we met uw gegevens en lichaamsmateriaal?

Doet u mee met het onderzoek? Dan geeft u ook toestemming om uw gegevens te verzamelen, gebruiken en bewaren. Daarnaast kunt u extra toestemming geven om uw lichaamsmateriaal te verzamelen, gebruiken en bewaren.



## Proefpersoneninformatie preRADAR



### *Welke gegevens bewaren we?*

We bewaren deze gegevens:

- uw naam
- uw geslacht
- uw adres
- uw geboortedatum
- gegevens over uw gezondheid
- (medische) gegevens die we tijdens het onderzoek verzamelen

### *Welk lichaamsmateriaal bewaren we?*

We bewaren buisjes bloed, tumorweefsel en ontlasting.

### *Waarom verzamelen, gebruiken en bewaren we uw gegevens (en lichaamsmateriaal)?*

We verzamelen, gebruiken en bewaren uw gegevens (en als u toestemming geeft, ook uw lichaamsmateriaal) om de vragen van dit onderzoek te kunnen beantwoorden. En om de resultaten te kunnen publiceren.

### *Hoe beschermen we uw privacy?*

Om uw privacy te beschermen geven wij uw gegevens een code. Op al uw gegevens zetten we alleen deze code. De sleutel van de code bewaren we op een beveiligde plek in het UMC Utrecht. Als we uw gegevens verwerken, gebruiken we steeds alleen die code. Ook in rapporten en publicaties over het onderzoek kan niemand terughalen dat het over u ging.

### *Wie kunnen uw gegevens zien?*

Sommige personen kunnen wel uw naam en andere persoonlijke gegevens zonder code inzien. Dit zijn mensen die controleren of de onderzoekers het onderzoek goed en betrouwbaar uitvoeren. Deze personen kunnen bij uw gegevens komen:

- o De onderzoekers.
- o Een controleur die voor het UMC Utrecht werkt.
- o Nationale autoriteiten zoals de Inspectie Gezondheidszorg en Jeugd.

Deze personen houden uw gegevens geheim. Wij vragen u voor deze inzage toestemming te geven.

### *Hoelang bewaren we uw gegevens?*

We bewaren uw gegevens 15 jaar in het UMC Utrecht.

### *Hoelang bewaren we uw lichaamsmateriaal?*

Uw bloed, tumorweefsel en ontlasting versturen we naar het Antoni van Leeuwenhoek. Daar wordt het onderzocht en bewaard. Het lichaamsmateriaal wordt maximaal 30 jaar bewaard om nieuwe bepalingen te kunnen doen die te maken hebben met dit onderzoek. Zodra dit niet meer nodig is, vernietigen we uw lichaamsmateriaal.

## Proefpersoneninformatie preRADAR



### *Wat gebeurt er bij onverwachte ontdekkingen?*

Tijdens het onderzoek kunnen we toevallig iets vinden dat belangrijk is voor uw gezondheid. Uw behandelend arts neemt dan contact op met u. U kunt met uw huisarts of specialist bespreken wat er moet gebeuren. U geeft met het formulier toestemming voor het informeren van uw huisarts of specialist.

### *Kunt u uw toestemming voor het gebruik van uw gegevens weer intrekken?*

U kunt uw toestemming voor het gebruik van uw gegevens op ieder moment intrekken. Maar let op: trekt u uw toestemming in, en hebben onderzoekers dan al gegevens verzameld voor een onderzoek? Dan mogen zij deze gegevens nog wel gebruiken.

Voor uw lichaamsmateriaal geldt dat de onderzoekers dit vernietigen nadat u uw toestemming intrekt. Maar zijn er dan al metingen gedaan met uw lichaamsmateriaal? Dan mag de onderzoeker de resultaten daarvan blijven gebruiken.

### *Wilt u meer weten over uw privacy?*

- Wilt u meer weten over uw rechten bij de verwerking van persoonsgegevens? Kijk dan op [www.autoriteitpersoonsgegevens.nl](http://www.autoriteitpersoonsgegevens.nl).
- Heeft u vragen over uw rechten? Kijk dan op <https://www.umcutrecht.nl/nl/rechten-in-de-zorg>
- Als u klachten heeft over de verwerking van uw persoonsgegevens, raden we u aan om deze eerst te bespreken met het onderzoeksteam. U kunt ook naar de Functionaris Gegevensbescherming van het UMC Utrecht gaan. Of u dient een klacht in bij de Autoriteit Persoonsgegevens (bijlage A).

### *Waar vindt u meer informatie over het onderzoek?*

Op de volgende website(s) vindt u meer informatie over het onderzoek: <https://trialsearch.who.int/>. Na het onderzoek kan de website een samenvatting van de resultaten van dit onderzoek tonen. U vindt het onderzoek door te zoeken op ID: NL8997.

## **11. Krijgt u een vergoeding als u meedoet aan het onderzoek?**

De extra bestralingsdagen en controlemomenten voor het onderzoek kosten u niets. U krijgt ook geen vergoeding als u meedoet aan dit onderzoek. Wel krijgt u een vergoeding voor uw (extra) reiskosten

## **12. Bent u verzekerd tijdens het onderzoek?**

Voor iedereen die meedoet aan dit onderzoek is een verzekering afgesloten. De verzekering betaalt voor schade door het onderzoek. Maar niet voor alle schade. In bijlage B vindt u meer informatie over de verzekering en de uitzonderingen. Daar staat ook aan wie u schade kunt melden.

## **13. We informeren uw huisarts en behandelend specialist**

**Proefpersoneninformatie preRADAR**

De onderzoeker stuurt uw huisarts en behandelend chirurg een bericht om te laten weten dat u meedoet aan het onderzoek. Dit is voor uw eigen veiligheid. Indien u bijwerkingen krijgt van de extra bestralingen, kunnen we contact opnemen met uw huisarts.

**14. Heeft u vragen?**

Vragen over het onderzoek kunt u stellen aan de onderzoekers. Wilt u advies van iemand die er geen belang bij heeft? Ga dan naar dr. van der Voort-van Zijp (radiotherapeut-oncoloog, UMC Utrecht). Hij weet veel over het onderzoek, maar werkt niet mee aan dit onderzoek.

*Heeft u een klacht?*

Bespreek dit dan met de onderzoeker of de arts die u behandelt. Wilt u dit liever niet? Ga dan naar de klachtenbemiddelaars van het UMC Utrecht. In bijlage A staat waar u die kunt vinden.

**15. Hoe geeft u toestemming voor het onderzoek?**

U kunt eerst rustig nadenken over dit onderzoek. Daarna vertelt u de onderzoeker of u de informatie begrijpt. Wilt u meedoen? Dan vult u het toestemmingsformulier in, Bijlage D. U en de onderzoeker krijgen allebei een getekende versie van deze toestemmingsverklaring.

Dank voor uw tijd.

**16. Bijlagen bij deze informatie**

- A. Contactgegevens
- B. Informatie over de verzekering
- C. Overzicht onderzoekshandelingen en controles
- D. Toestemmingsformulieren

**Proefpersoneninformatie preRADAR****Bijlage A: contactgegevens***Contactpersoon:*

Drs. Hidde Eijkelenkamp, arts-onderzoeker  
Afdeling radiotherapie, UMC Utrecht  
Huispostnummer Q.00.311  
Antwoordnummer 8419  
3508 GA Utrecht  
Direct bereikbaar op werkdagen 8:00-16.30u:  
T: 088-75559112  
E: [preradar@umcutrecht.nl](mailto:preradar@umcutrecht.nl)

*Hoofdonderzoeker UMC Utrecht:*

Dr. Martijn P.W. Intven, radiotherapeut-oncoloog  
Bereikbaar op werkdagen 8:00-16.30u via afdeling radiotherapie, UMC Utrecht:  
T: 088-7558800

*Noodgevallen buiten kantooruren :*

Dienstdoende radiotherapeut-oncoloog, bereikbaar via afdeling radiotherapie, UMC Utrecht  
T : 088-7558800

*Onafhankelijk arts:*

Dr. Jochem van der Voort-van Zijp, radiotherapeut-oncoloog  
Bereikbaar op werkdagen 8:00-16.30u via afdeling radiotherapie, UMC Utrecht:  
T: 088-7558800

*Heeft u een klacht?*

Bespreek dit dan met de onderzoeker of de arts die u behandelt. Wilt u dit liever niet? Ga dan naar de klachtenbemiddelaars van het UMC Utrecht.  
T: 088 75 562 08  
<https://www.umcutrecht.nl/nl/een-klacht-indienen>

*Functionaris voor de Gegevensbescherming van het UMC Utrecht:*

T: 088 75 555 55  
E: [privacy@umcutrecht.nl](mailto:privacy@umcutrecht.nl)  
<https://www.umcutrecht.nl/nl/privacy>

*Voor meer informatie over uw rechten:*

<https://www.umcutrecht.nl/nl/rechten-in-de-zorg>  
<https://autoriteitpersoonsgegevens.nl/>

## Proefpersoneninformatie preRADAR

**Bijlage B: informatie over de verzekering**

Het UMC Utrecht heeft een verzekering afgesloten voor iedereen die meedoet aan het onderzoek. De verzekering betaalt de schade die u heeft doordat u aan het onderzoek meedeed. Het gaat om schade die u krijgt tijdens het onderzoek, of binnen 4 jaar na het onderzoek. U moet schade binnen 4 jaar melden bij de verzekeraar.

Bij schade kunt u direct contact leggen met de verzekeraar.

De verzekeraar van het onderzoek is:

|                 |                                       |
|-----------------|---------------------------------------|
| Naam:           | CNA Insurance Company Ltd             |
| Contactpersoon: | mevrouw Esther van Herk               |
| Adres:          | Strawinskylaan 703, 1077 XX Amsterdam |
| Telefoonnummer: | 020 5737274                           |
| E-mail:         | Esther.Vanherk@cnaahardy.com          |
| Polisnummer:    | 10201366                              |

De verzekering biedt een dekking van € 650.000 per proefpersoon en € 5.000.000 voor het hele onderzoek en € 7.500.000 per jaar voor alle onderzoeken van dezelfde opdrachtgever.

Let op: de verzekering dekt de volgende schade **niet**:

- Schade door een risico waarover we u informatie hebben gegeven in deze brief. Maar dit geldt niet als het risico groter bleek te zijn dan we van tevoren dachten. Of als het risico heel onwaarschijnlijk was.
- Schade aan uw gezondheid die ook zou zijn ontstaan als u niet aan het onderzoek had meegedaan.
- Schade die ontstaat doordat u aanwijzingen of instructies niet of niet goed opvolgde.
- Schade aan de gezondheid van uw kinderen of kleinkinderen.
- Schade door een behandelmethode die al bestaat. Of door onderzoek naar een behandelmethode die al bestaat.

Deze bepalingen staan in het 'Besluit verplichte verzekering bij medisch-wetenschappelijk onderzoek met mensen 2015'. Dit besluit staat in de Wettenbank van de overheid (<https://wetten.overheid.nl>).

## Proefpersoneninformatie preRADAR



## Bijlage C: overzicht onderzoekshandelingen en controles

| WEEK    | IN HET ZIEKENHUIS                                                                                                                                                                                                                                                                                                                                                                                                           | THUIS                                                                                                                                                                       |
|---------|-----------------------------------------------------------------------------------------------------------------------------------------------------------------------------------------------------------------------------------------------------------------------------------------------------------------------------------------------------------------------------------------------------------------------------|-----------------------------------------------------------------------------------------------------------------------------------------------------------------------------|
| -x      | Gesprek over behandeling met bestralingsarts. Na ten minste 3 dagen bedenktijd kunt u het toestemmingsformulier voor dit onderzoek tekenen met de onderzoeker.<br> +  +  |       |
| 1       | 5 standaardbestralingen, op de tweede dag :  +  +                                                                                                                     |       |
| 2       | 2-5 extra bestralingen voor het onderzoek                                                                                                                                                                                                                                                                                                                                                                                   |       |
| 3       |                                                                                                                                                                                                                                                                                                                                                                                                                             |       |
| 4       |                                                                                                                                                                                                                                                                                                                                                                                                                             |       |
| 5       |                                                                                                                                                                                                                                                                                                                                                                                                                             |       |
| 6       |                                                                                                                                                                                                                                                                                                                                                                                                                             |                                                                                                                                                                             |
| 7       |                                                                                                                                                                                                                                                                                                                                                                                                                             |       |
| 8       |                                                                                                                                                                                                                                                                                                                                                                                                                             |                                                                                                                                                                             |
| 9       |                                                                                                                                                                                                                                                                                                                                                                                                                             |       |
| 10      |                                                                                                                                                                                                                                                                                                                                                                                                                             |                                                                                                                                                                             |
| 11      | Eerste controle met MRI-scan en kijkonderzoek. (a) Is de tumor nog groot?                                                                                                                                                                                                                                                                                                                                                   |     |
| 12      | Dan wordt u ingepland voor een operatie om de endeldarm te verwijderen. (b)                                                                                                                                                                                                                                                                                                                                                 |                                                                                                                                                                             |
| 13      | Is de tumor klein of weg? Dan zien we u terug bij de tweede controle.                                                                                                                                                                                                                                                                                                                                                       |   |
| 14      |                                                                                                                                                                                                                                                                                                                                                                                                                             |                                                                                                                                                                             |
| 15      |                                                                                                                                                                                                                                                                                                                                                                                                                             |   |
| 16      | Tweede controle met kijkonderzoek en/of MRI-scan om te zien of de tumor                                                                                                                                                                                                                                                                                                                                                     |                                                                                                                                                                             |
| 17      | helemaal weg is. U kiest met uw arts tussen (a) een endeldarmoperatie, (b)                                                                                                                                                                                                                                                                                                                                                  |   |
| 18      | een kleine ingreep of (c) behandeling zonder operatie.  +                                                                                                                                                                                         |                                                                                                                                                                             |
| 19      |                                                                                                                                                                                                                                                                                                                                                                                                                             |   |
| 20      |                                                                                                                                                                                                                                                                                                                                                                                                                             |                                                                                                                                                                             |
| ½ jaar  |                                                                                                                                                                                                                                                                                                                                          |   |
| 1 jaar  |                                                                                                                                                                                                                                                                                                                                          |   |
| 1½ jaar |                                                                                                                                                                                                                                                                                                                                          |   |
| 2 jaar  |                                                                                                                                                                                                                                                                                                                                          |   |

 U beantwoordt 5 vragen over uw darmfunctie in het dagboek (papier of online).

 U wordt gebeld door de arts-onderzoeker om te horen hoe het gaat.

 U gaat naar het UMC Utrecht voor bloedafname.

 U stuurt uw ontlasting op per post naar het Antoni van Leeuwenhoek.

 U ondergaat een extra MRI-scan (met contrast).

 U ontvangt vragenlijsten over kwaliteit van leven, darm- en blaasfunctie en seksualiteit.

**Proefpersoneninformatie preRADAR**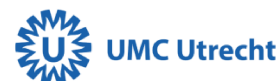**Bloedafname**

1. Voor start van de behandeling
2. Na de 2<sup>e</sup> bestraling
3. Bij de tweede controle (16-20 weken na start bestraling)
4. Bij de controle na 6 maanden
5. Bij de controle na 12 maanden
6. Bij de controle na 18 maanden
7. Bij de controle na 24 maanden

**Weefsel**

1. Van het kijkonderzoek in de darm
2. Als u geopereerd wordt aan de endeldarm

**Ontlasting**

1. Voor start van de behandeling
2. Na de 2<sup>e</sup> bestraling
3. Bij de tweede controle (16-20 weken na start bestraling)

**Extra MRI opnames**

1. Voor start van de behandeling, dit gebeurt 1x wanneer u toch al in het UMC Utrecht bent en kost ongeveer 30 minuten
2. Met contrastvloeistof in het bloedvat, dit gebeurt 2x en kost 5 minuten extra per keer
  - a. Voor start van de behandeling
  - b. Tijdens de 2<sup>e</sup> bestraling

**Vragenlijsten over kwaliteit van leven, darm- en blaasfunctie en seksualiteit**

1. Voor start van de behandeling
2. Na 3 maanden
3. Na 6 maanden
4. Na 12 maanden
5. Na 18 maanden
6. Na 24 maanden

**Proefpersoneninformatie preRADAR**

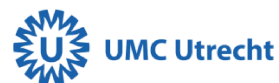



## Proefpersoneninformatie preRADAR



## Bijlage D: toestemmingsformulier proefpersoon

*Behorende bij 'Hogere dosis bestraling voor niet-operatieve behandeling van endeldarmkanker: het preRADAR onderzoek'*

- Ik heb de informatiebrief gelezen. Ook kon ik vragen stellen. Mijn vragen zijn goed genoeg beantwoord. Ik had genoeg tijd om te beslissen of ik meedoe.
- Ik weet dat meedoen vrijwillig is. Ook weet ik dat ik op ieder moment kan beslissen om toch niet mee te doen met het onderzoek. Of om ermee te stoppen. Ik hoef dan niet te zeggen waarom ik wil stoppen.
- Ik geef de onderzoeker toestemming om mijn huisarts en specialisten die mij behandelen te laten weten dat ik meedoe aan dit onderzoek.
- Ik geef de onderzoeker toestemming om informatie op te vragen bij mijn huisarts en specialisten die mij behandelen.
- Ik geef de onderzoeker toestemming om mijn huisarts of specialist informatie te geven over onverwachte bevindingen uit het onderzoek die van belang zijn voor mijn gezondheid.
- Ik geef de onderzoekers toestemming om mijn gegevens (en lichaamsmateriaal) te verzamelen en gebruiken. De onderzoekers doen dit alleen om de onderzoeksvraag van dit onderzoek te beantwoorden.
- Ik geef de onderzoekers toestemming om mij vragenlijsten over kwaliteit van leven, darm- en blaasfunctie en seksualiteit te sturen.
- Ik geef de onderzoekers toestemming om mij een eetdagboek te sturen.
- Ik weet dat voor de controle van het onderzoek sommige mensen al mijn gegevens kunnen inzien. Die mensen staan in deze informatiebrief. Ik geef deze mensen toestemming om mijn gegevens in te zien voor deze controle.
- Ik weet dat ik niet zwanger mag worden/mijn partner niet zwanger mag maken tijdens het onderzoek.
- Ik wil meedoen aan dit onderzoek.
- Wilt u ja of nee aankruisen voor de extra onderdelen van dit onderzoek (zie bijlage C)?

|                                                                                     |                             |                              |
|-------------------------------------------------------------------------------------|-----------------------------|------------------------------|
| Ik geef toestemming voor extra bloedafnames.                                        | <input type="checkbox"/> Ja | <input type="checkbox"/> Nee |
| Ik geef toestemming voor opslag van tumorweefsel.                                   | <input type="checkbox"/> Ja | <input type="checkbox"/> Nee |
| Ik geef toestemming voor onderzoek van mijn ontlasting.                             | <input type="checkbox"/> Ja | <input type="checkbox"/> Nee |
| Ik geef toestemming voor eenmalig een extra MRI-scan voor start van de behandeling. | <input type="checkbox"/> Ja | <input type="checkbox"/> Nee |
| Ik geef toestemming voor MRI-opnames met contrastvloeistof.                         | <input type="checkbox"/> Ja | <input type="checkbox"/> Nee |

Op de volgende bladzijde kunt u uw handtekening zetten.

## Proefpersoneninformatie preRADAR

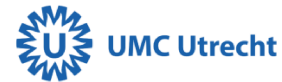

Mijn naam is (proefpersoon): .....

Handtekening: .....

Datum : \_\_ / \_\_ / \_\_

---

Ik verklaar dat ik deze proefpersoon volledig heb geïnformeerd over het genoemde onderzoek. Wordt er tijdens het onderzoek informatie bekend die de toestemming van de proefpersoon kan beïnvloeden? Dan laat ik dit op tijd weten aan deze proefpersoon.

Naam onderzoeker (of diens vertegenwoordiger):.....

Handtekening:.....

Datum: \_\_ / \_\_ / \_\_

## Proefpersoneninformatie preRADAR



## Bijlage D: toestemmingsformulier proefpersoon

*Behorende bij 'Hogere dosis bestraling voor niet-operatieve behandeling van endeldarmkanker: het preRADAR onderzoek'*

- Ik heb de informatiebrief gelezen. Ook kon ik vragen stellen. Mijn vragen zijn goed genoeg beantwoord. Ik had genoeg tijd om te beslissen of ik meedoe.
- Ik weet dat meedoen vrijwillig is. Ook weet ik dat ik op ieder moment kan beslissen om toch niet mee te doen met het onderzoek. Of om ermee te stoppen. Ik hoef dan niet te zeggen waarom ik wil stoppen.
- Ik geef de onderzoeker toestemming om mijn huisarts en specialisten die mij behandelen te laten weten dat ik meedoe aan dit onderzoek.
- Ik geef de onderzoeker toestemming om informatie op te vragen bij mijn huisarts en specialisten die mij behandelen.
- Ik geef de onderzoeker toestemming om mijn huisarts of specialist informatie te geven over onverwachte bevindingen uit het onderzoek die van belang zijn voor mijn gezondheid.
- Ik geef de onderzoekers toestemming om mijn gegevens (en lichaamsmateriaal) te verzamelen en gebruiken. De onderzoekers doen dit alleen om de onderzoeksvraag van dit onderzoek te beantwoorden.
- Ik geef de onderzoekers toestemming om mij vragenlijsten over kwaliteit van leven, darm- en blaasfunctie en seksualiteit te sturen.
- Ik weet dat voor de controle van het onderzoek sommige mensen al mijn gegevens kunnen inzien. Die mensen staan in deze informatiebrief. Ik geef deze mensen toestemming om mijn gegevens in te zien voor deze controle.
- Ik weet dat ik niet zwanger mag worden/mijn partner niet zwanger mag maken tijdens het onderzoek.
- Ik wil meedoen aan dit onderzoek.
- Wilt u ja of nee aankruisen voor de extra onderdelen van dit onderzoek (zie bijlage C)?

|                                                                                     |                             |                              |
|-------------------------------------------------------------------------------------|-----------------------------|------------------------------|
| Ik geef toestemming voor extra bloedafnames.                                        | <input type="checkbox"/> Ja | <input type="checkbox"/> Nee |
| Ik geef toestemming voor opslag van tumorweefsel.                                   | <input type="checkbox"/> Ja | <input type="checkbox"/> Nee |
| Ik geef toestemming voor onderzoek van mijn ontlasting.                             | <input type="checkbox"/> Ja | <input type="checkbox"/> Nee |
| Ik geef toestemming voor eenmalig een extra MRI-scan voor start van de behandeling. | <input type="checkbox"/> Ja | <input type="checkbox"/> Nee |
| Ik geef toestemming voor MRI-opnames met contrastvloeistof.                         | <input type="checkbox"/> Ja | <input type="checkbox"/> Nee |

Op de volgende bladzijde kunt u uw handtekening zetten.

**Proefpersoneninformatie preRADAR****Mijn naam is (proefpersoon): .....****Handtekening: .....****Datum : \_\_ / \_\_ / \_\_**

---

Ik verklaar dat ik deze proefpersoon volledig heb geïnformeerd over het genoemde onderzoek. Wordt er tijdens het onderzoek informatie bekend die de toestemming van de proefpersoon kan beïnvloeden? Dan laat ik dit op tijd weten aan deze proefpersoon.

**Naam onderzoeker (of diens vertegenwoordiger):.....****Handtekening:.....****Datum: \_\_ / \_\_ / \_\_**
