# Supplementary material for: Towards Response ADAptive Radiotherapy for organ preservation for intermediate-risk rectal cancer (preRADAR): protocol of a phase I dose-escalation trial
Source: HighWire-hosted journal article supplement (doi:10.1136/bmjopen-2022-065010), 2023-06-01
Supplement: bmjopen-2022-065010supp002_data_supplement.pdf [file bmjopen-2022-065010supp002_data_supplement.pdf]

**Supplementary File 2: equivalent dose limits for organs at risk**

| Structure                            | Volume (cc) | EQD2 $\alpha/\beta = 3$ (Gy) | Comments                                                                              |
|--------------------------------------|-------------|------------------------------|---------------------------------------------------------------------------------------|
| Small Bowel (loops) <sup>1,2,3</sup> | 0.5         | 70                           | Constraint                                                                            |
|                                      | 10          | 40                           | Aim                                                                                   |
| Large Bowel (loops)                  | 0.5         | 60.16                        | Constraint, excluding the sigmoid lying in the course of the bowel within 2 cm of GTV |
| Bladder <sup>1,4</sup>               | 0.5         | 80.56                        | Constraint                                                                            |
| Plexus Sacral <sup>1,4</sup>         | 0.1         | 60.16                        | Constraint                                                                            |
|                                      | 5           | 54                           | Constraint                                                                            |

For the vagina no formal constraints exists, though we will try to limit the dose to this organ.

Patients will receive instructions for the use of dilators after radiotherapy.

<sup>1</sup> UK SABR consortium 2019. Stereotactic Ablative Body Radiation Therapy (SABR): A Resource version 6.1

<sup>2</sup> ABC-07 Addition of stereotactic body radiotherapy to systemic chemotherapy in locally advanced biliary tract. Cancer Research UK. [Accessed: 06.01.16]; Available from: <http://www.cancerresearchuk.org/about-cancer/find-a-clinical-trial/a-trial-looking-chemotherapy-stereotactic-radiotherapy-people-locally-advanced-bile-duct-cancer-abc-07> -undefined.

<sup>3</sup> A trial looking at stereotactic body radiotherapy before surgery for pancreatic cancer (SPARC). Cancer Research UK. [Accessed: 14.12.16]; Available from: <http://www.cancerresearchuk.org/about-cancer/find-a-clinical-trial/a-trial-looking-at-stereotactic-body-radiotherapy-before-surgery-for-pancreatic-cancer-sparc> -undefined.

<sup>4</sup> Benedict SH, Yenice KM, Followill D, et al. Stereotactic body radiation therapy: the report of AAPM Task Group 101. *Med Phys.* 2010;37(8):4078-101
